# Supplementary material for: Fungal–bacterial interaction selects for quorum sensing mutants with increased production of natural antifungal compounds
Source: PubMed Central journal article supplement (PMC7661731; doi:10.1038/s42003-020-01342-0), 2020-11-12
Supplement: 42003_2020_1342_MOESM1_ESM.pdf [file 42003_2020_1342_MOESM1_ESM.pdf]

1 **Supplementary Information**

2

3 **Fungal-bacterial interaction selects for quorum sensing mutants with**  
4 **increased production of natural antifungal compounds**

5

6 Andrea G. Albarracín Orio<sup>1,2,3,4\*</sup>, Daniel Petras<sup>4,5‡</sup>, Romina A. Tobares<sup>2,3‡</sup>, Alexander A.  
7 Aksenov<sup>4</sup>, Mingxum Wang<sup>4</sup>, Florencia Juncosa<sup>1</sup>, Pamela Sayago<sup>1</sup>, Alejandro J. Moyano<sup>2,3</sup>,  
8 Pieter C. Dorrestein<sup>4\*</sup> and Andrea M. Smania<sup>2,3\*</sup>

9

10 <sup>1</sup>IRNASUS, Universidad Católica de Córdoba, CONICET, Facultad de Ciencias  
11 Agropecuarias. Av. Armada Argentina 3555 (X5016DHK) Córdoba, Argentina.

12 <sup>2</sup>Universidad Nacional de Córdoba. Facultad de Ciencias Químicas. Departamento de  
13 Química Biológica Ranwel Caputto. Córdoba, Argentina.

14 <sup>3</sup>CONICET. Universidad Nacional de Córdoba. Centro de Investigaciones en Química  
15 Biológica de Córdoba (CIQUIBIC), Córdoba, Argentina.

16 <sup>4</sup>Collaborative Mass Spectrometry Innovation Center, 9500 Gilman Drive, University of  
17 California, San Diego, CA 92093, USA.

18 <sup>5</sup>Scripps Institution of Oceanography, University of California San Diego. La Jolla, CA  
19 92093, USA.

20

21 Corresponding authors: [andrea.albarracin@gmail.com](mailto:andrea.albarracin@gmail.com) (Andrea G. Albarracín Orio);  
22 [asmania@fcq.unc.edu.ar](mailto:asmania@fcq.unc.edu.ar) (Andrea M. Smania); [pdorrestein@ucsd.edu](mailto:pdorrestein@ucsd.edu) (Pieter C.  
23 Dorrestein)

24

25

26 ‡ These authors contributed equally to this work

27

28 **Supplementary file includes:**

29 Supplementary Figures 1 to 5

30 Supplementary Tables 1 to 4

31 Supplementary Methods

32 Supplementary References

33

34 **Supplementary figures and legends**

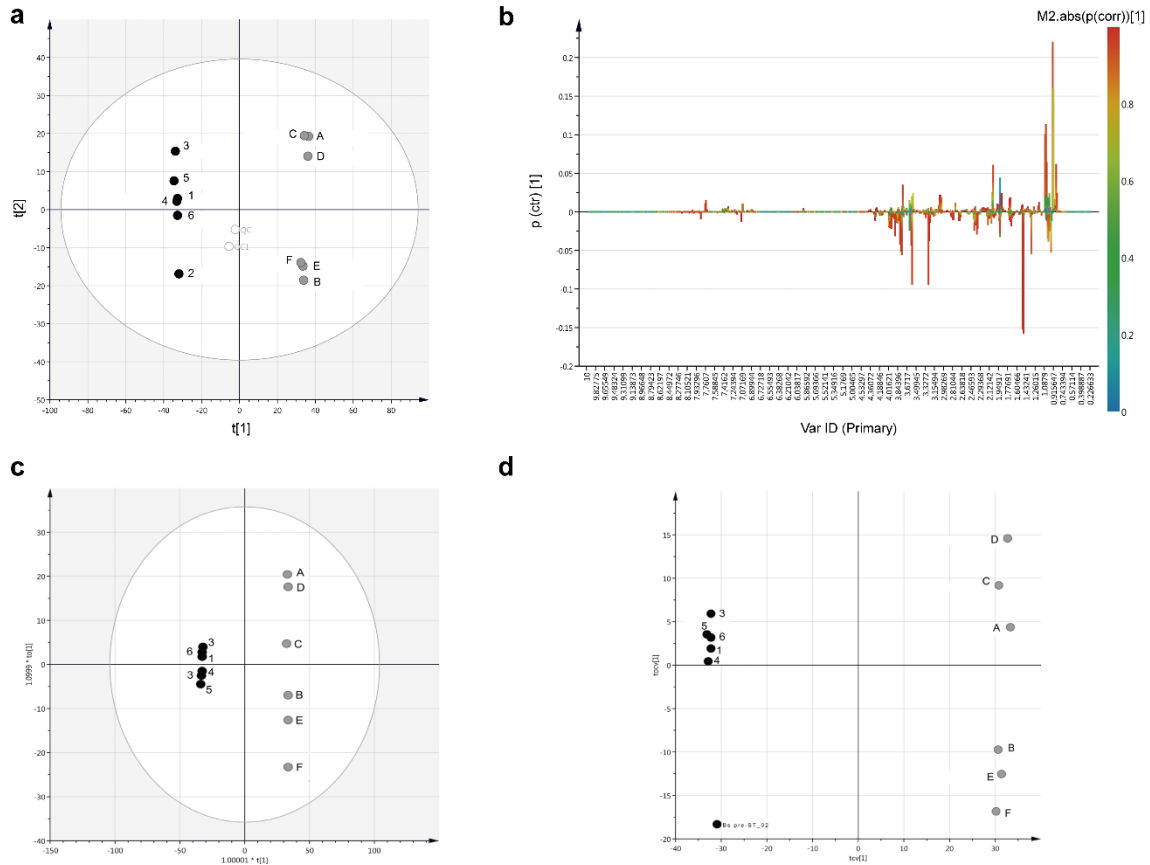

35

36 **Supplementary Figure 1. Metabolomics profile variation in *B. subtilis* ALBA01 was**  
 37 **observed following *in vitro* interaction with *S. terrestris***

38 High antifungal activity of cell-free supernatants of post-ST variants correlates with changes  
 39 in metabolomic profiles of released compounds, since cell-free supernatants of pre- vs. post-  
 40 ST variants showed detectable differences using untargeted NMR approach. **(a)** Plot of PCA  
 41 scores shows clear separation of supernatant samples according to their type (black, pre-  
 42 ST; gray, post-ST) in the first two principal components derived from <sup>1</sup>H-NMR spectra of  
 43 *Bacillus*-conditioned media (percent variation in NMR data explained by the model, R2x=  
 44 70.4%; percent variation in NMR data predicted by the model from cross-validation, Q2x=  
 45 57%, based on 2-components model). White circles: quality control (QC) samples. **(b)**  
 46 OPLS-DA S-line plots with pairwise comparison of data from NMR spectra from cell-free  
 47 supernatants of pre- and post-ST. The left y-axis represents p(ctr)[1], the covariance

48 between a variable and the classification score, which indicates if an increase or decrease  
49 of a variable correlates with the classification score. The right y-axis shows  $p(\text{corr})[1]$ , the  
50 correlation coefficient between a variable and the classification score (i.e. the normalized  
51 covariance), which provides a linear indication of the correlation strength. Colors are  
52 associated with correlation of metabolites characterized from  $^1\text{H-NMR}$  data for the class of  
53 interest, using the scale on the right with the red color standing for the highest absolute value  
54 of the correlation coefficient. Then, chemical shifts (Var ID, x-axis) showing higher  
55 correlation values, or red color, represent strongly discriminating variables that separate  
56 post-ST from pre-ST samples. **(c)** Plots of OPLS-DA scores and cross-validated scores for  
57 pre-ST (black) and post-ST (gray) samples. This analysis was performed to rule out potential  
58 bias in sample separation resulting from sample run order. Similar grouping profiles were  
59 observed, with two separate clusters for pre- and post-ST samples. **(d)** Orthogonal partial  
60 least squares discriminative analysis (OPLS-DA) of data to maximize separation between  
61 the groups.

62

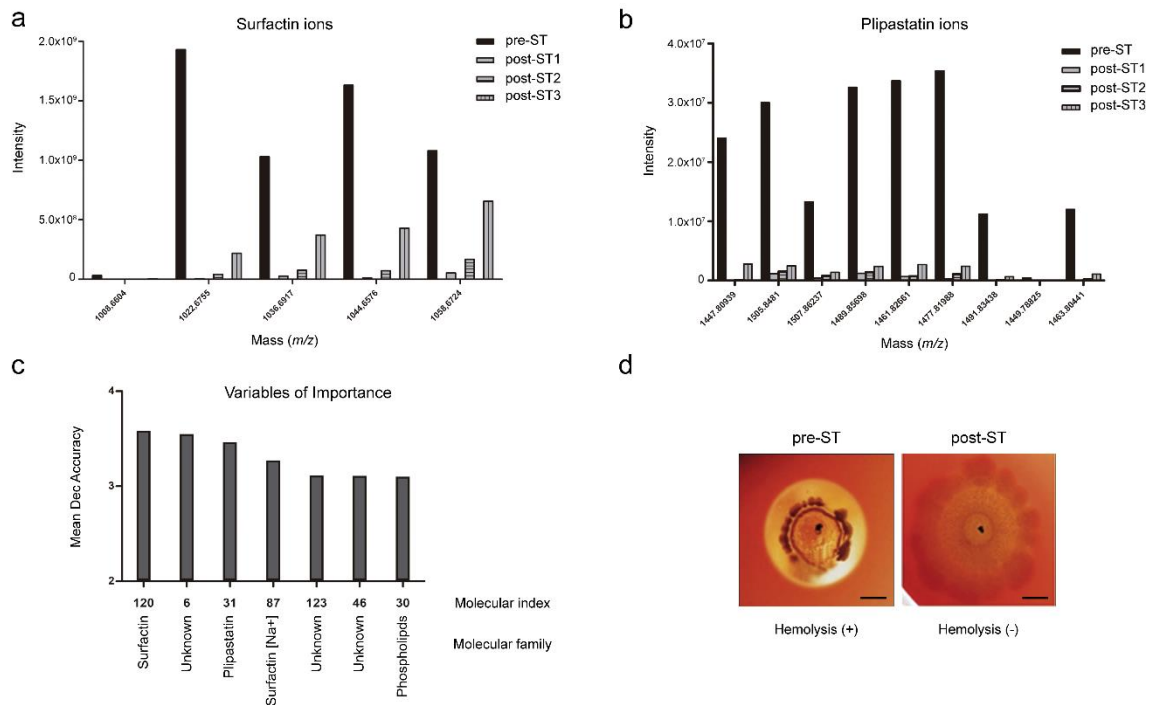

63

64

65 **Supplementary Figure 2. LC-MS/MS-based metabolomic analysis showing chemical**  
 66 **signatures that distinguish pre- from post-ST variants**

67 *B. subtilis* post-ST variants show strongly reduced Intensities of **(a)** surfactin and **(b)**  
 68 plipastatin ions in whole cell metabolomics analysis. Determinations were performed on  
 69 three independently obtained post-ST variants (see Methods for details): post-ST1, post-  
 70 ST2 and post-ST3 (three samples each one) **(c)** Random forest analysis indicated that  
 71 surfactin and plipastatin are major variables determining such separation. **(d)** Loss of  
 72 hemolytic activity in post-ST variants. Scale bar: 0.2 cm.

73

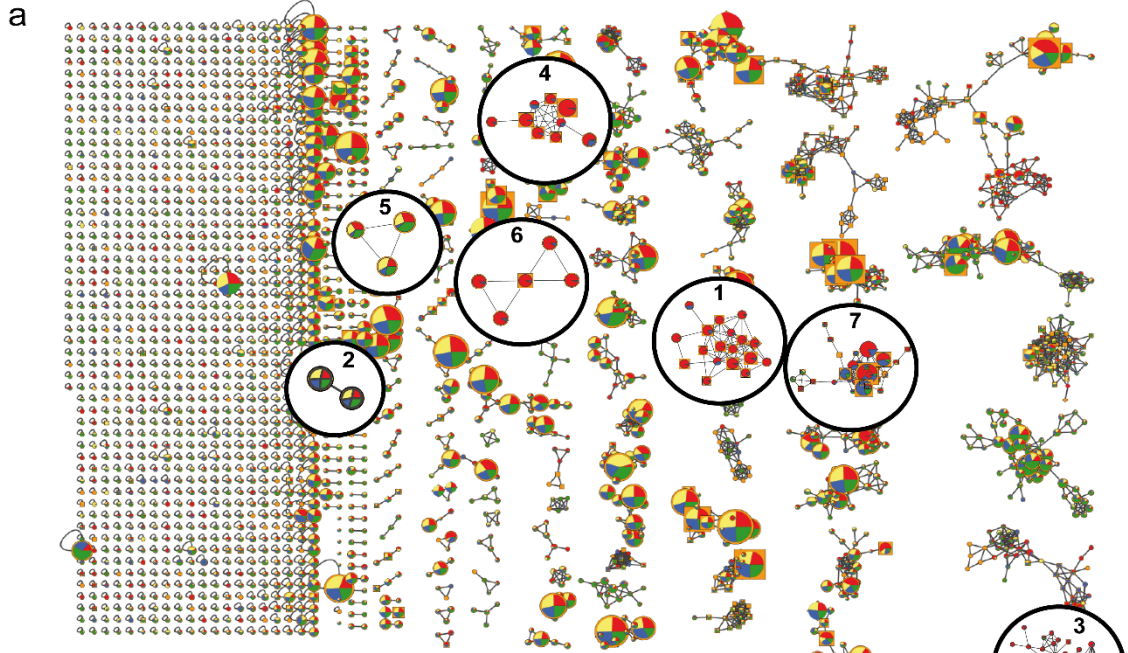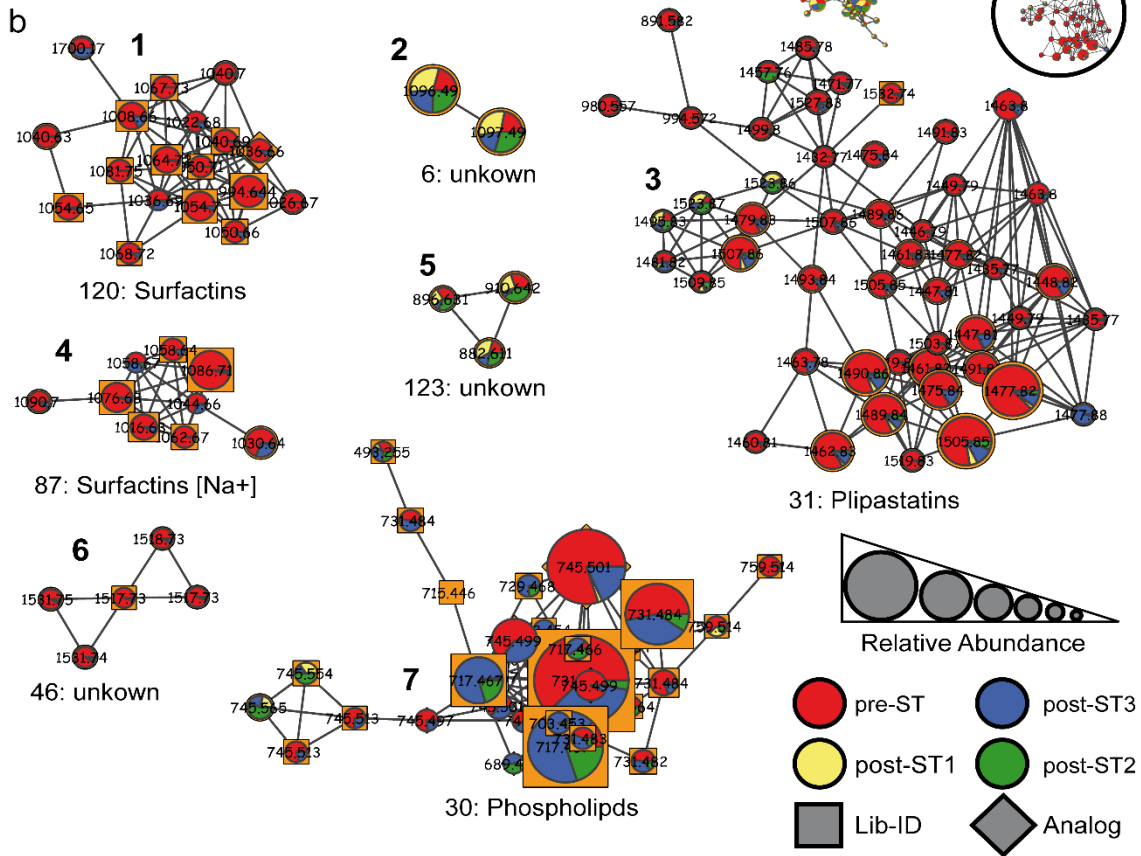

74

75

76

77 **Supplementary Figure 3. Molecular networks of MS/MS spectra**

78 **(a)** Global network of all MS/MS spectra (nodes), connected (edges) on the basis of spectral  
79 similarity. **(b)** Magnified images of specific subnetworks (molecular families), which  
80 correspond to variables of importance that separate groups according to random forest  
81 analysis. Pie charts inside the nodes indicate relative feature abundance (averaged XICs,  
82 normalized to TIC of particular groups) between groups. Node size indicates relative feature  
83 abundance of all samples (averaged XICs, normalized to TIC of all samples).

84

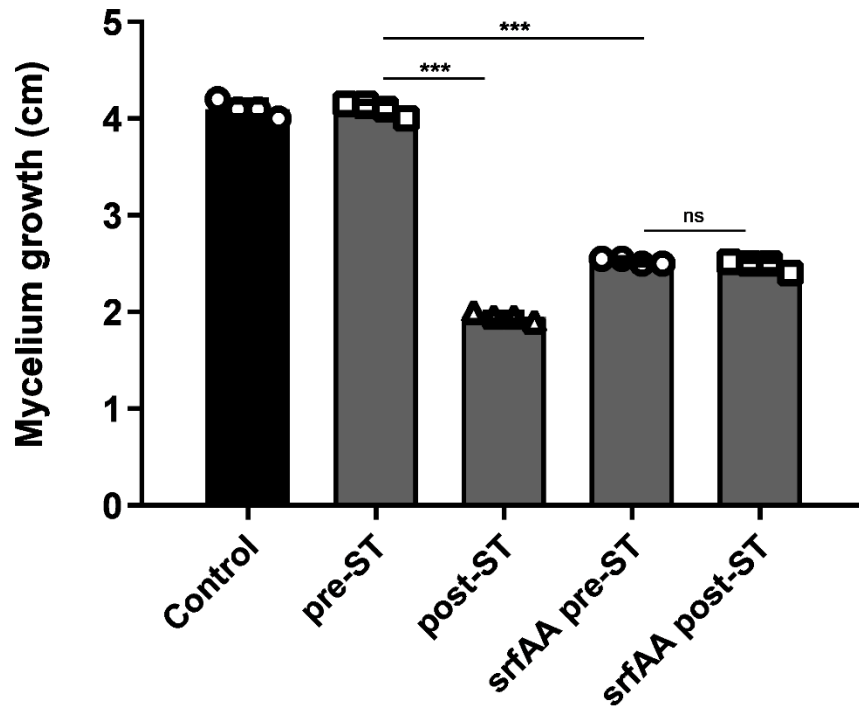

100

101 **Supplementary Figure 4. Elimination of surfactin production induces antifungal**  
 102 **activity**

103 Antifungal activities of cell-free supernatants of Bs ALBA01 pre- and post-ST and of its Bs  
 104 *srfAA* mutant were assayed as described in the text. Cell-free supernatants of surfactin-  
 105 defective mutant Bs *srfAA* and of Bs ALBA01 post-ST show clear antifungal activity. No  
 106 changes in the antifungal activity of Bs *srfAA* were observed before (*srfAA* pre-ST) or after  
 107 (*srfAA* post-ST) interaction with the fungus. Data shown are mean values of mycelial growth  
 108 from four independent replicate experiments. \*\*\*, significant difference between values ( $p <$   
 109 0.0001, Tukey's Multiple Comparison Test). ns, no significant difference.

110

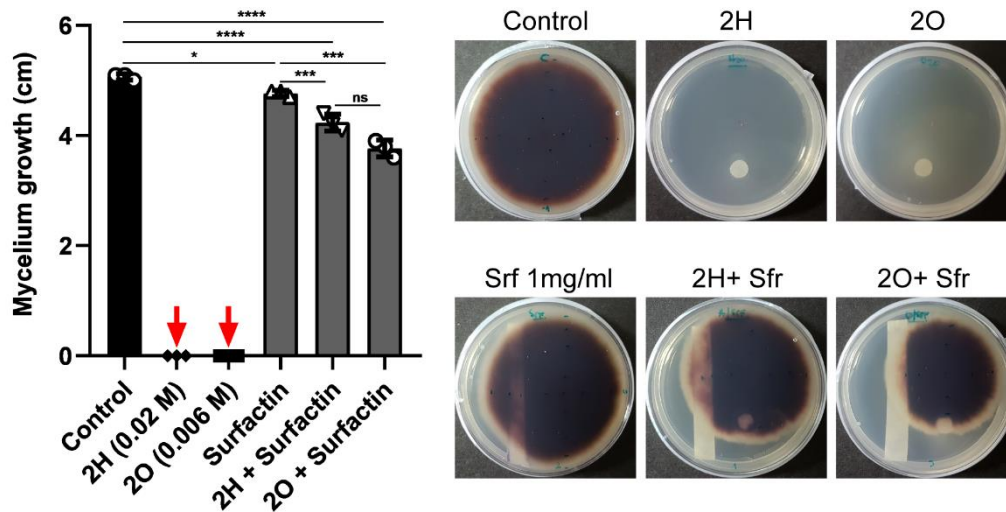

122

123 **Supplementary Figure 5. Surfactin interfere with the anti-*S. terrestris* activity of**  
 124 **ketones 2-heptanone and 2-octanone**

125 Suppressor effect of surfactin (1mg/ml imbibed in a filter paper strip with) on the antifungal  
 126 activity of 2H 0.02 M and 2O 0.006 M, 14 days after inoculation of *S. terrestris*. Data shown  
 127 are mean values of mycelial growth from three independent replicate experiments; red arrow  
 128 indicates lethal concentrations of 2-ketones. Statistically significant differences at  $p <$   
 129 0.0001,  $p < 0.001$  and  $p < 0.05$  are identified by \*\*\*, \*\* and \*, respectively (one-way ANOVA  
 130 followed by Tukey's Multiple Comparison Test). ns, no significant difference.

131



132 **Supplementary Tables**

133 **Supplementary Table 1.** Comparative whole-genome sequencing analysis of  
 134 independently obtained post-ST variants, and whole-genome sequencing of pools of  
 135 individuals (Pool-seq), revealed mutations in *comQXPA* coding regions. The +1A<sub>415</sub> *comA*  
 136 insertional mutation was found along with three new mutations: two nonsense substitutions  
 137 (T215A and C601T) and one 5-nucleotide insertion at position 299. The T215A mutation  
 138 generated a premature stop codon at position 126 of ComA protein, while the C601T and  
 139 the 5-nucleotide insertion generated stop codons at 201 and 78, respectively. Two new  
 140 mutations (both insertions) in *comP* were observed: GC insertion at gene position 1517  
 141 generated a truncated version of ComP protein with stop codon at position 512, and AT  
 142 insertion generated a stop codon at ComP position 232.

| <b>Variant</b> | <b>Scaffold/position</b> | <b>Gene</b>  | <b>Nucleotide substitution</b> | <b>Description</b>                           |
|----------------|--------------------------|--------------|--------------------------------|----------------------------------------------|
| Post-ST 1      | 1/69978                  | <i>comA</i>  | Ins A 415                      | Transcriptional regulatory protein ComA      |
| Post-ST 2      | 1/69978                  | <i>comA</i>  | Ins A 415                      | Transcriptional regulatory protein ComA      |
| Post-ST 2      | 2/165291                 | <i>yhfV</i>  | ΔA 1089                        | Methyl-accepting chemotaxis protein          |
| Post-ST 2      | 3/371952                 | <i>spo0A</i> | G289C                          | Sporulation two-component response regulator |
| Post-ST 3      | 1/71309                  | <i>comP</i>  | Δ632-731                       | Two-component sensor kinase ComP             |
| Pool-seq       | 1/69979                  | <i>comA</i>  | C601T                          |                                              |
| Pool-seq       | 1/69978                  | <i>comA</i>  | Ins A 415                      | Transcriptional regulatory protein ComA      |
| Pool-seq       | 1/70101                  | <i>comA</i>  | Ins CTGGG 299                  |                                              |
| Pool-seq       | 1/70185                  | <i>comA</i>  | T215A                          |                                              |
| Pool-seq       | 1/71264                  | <i>comP</i>  | Ins CG 1517                    | Two-component sensor kinase ComP             |
| Pool-seq       | 1/71919                  | <i>comP</i>  | Ins AT 863                     |                                              |

143

144

145 **Supplementary Table 2.** Bacterial and fungal strains used in this study.

146

| Strain                                            | Characteristics                                                                           | Source                                     |
|---------------------------------------------------|-------------------------------------------------------------------------------------------|--------------------------------------------|
| <i>Escherichia coli</i> DH5 $\alpha$              | F- $\Phi$ 80dlacZ $\Delta$ M12 minirecA                                                   | Our lab                                    |
| <i>Bacillus subtilis</i> ALBA01                   | Isolate from onion rhizosphere                                                            | Our lab                                    |
| <i>B. subtilis</i> pre-ST                         | <i>B. subtilis</i> ALBA01 before co-culture with <i>S. terrestris</i>                     | This study                                 |
| <i>B. subtilis</i> post-ST                        | Variants of <i>B. subtilis</i> ALBA01 obtained after co-culture with <i>S. terrestris</i> | This study                                 |
| <i>srfAA</i>                                      | <i>B. subtilis</i> ALBA01 surfactin-defective mutant                                      | This study                                 |
| <i>srfAA</i> pre-ST                               | Surfactin-defective mutant before co-culture with <i>S. terrestris</i>                    | This study                                 |
| <i>srfAA</i> post-ST                              | Surfactin-defective mutant after co-culture with <i>S. terrestris</i>                     | This study                                 |
| <i>B. subtilis</i> NCBI 3610 <i>srf-deficient</i> | <i>B. subtilis</i> NCBI 3610 <i>srfAA::mIs</i>                                            | Straight <i>et al.</i> , 2006 <sup>1</sup> |
| <i>Setophoma terrestris</i> PH06                  | Fungal strain isolated from onion rhizosphere                                             | Our lab                                    |

147

148

149

150 **Supplementary Table 3.** Oligonucleotide primers used in this study.

| <b>Primer</b> | <b>Sequence (5' – 3')</b>      | <b>Source</b>              |
|---------------|--------------------------------|----------------------------|
| Fsfa_nul      | CGCGGATCCTGACACGATGTTTCAGCCTTC | Modified from <sup>2</sup> |
| Rsfa_nul      | GCGGAATTCCAAAACGGTTTCCTTCGGTA  | Modified from <sup>2</sup> |
| FcomA_map     | TCAAGCAGCATGATTTCTCG           | This study                 |
| RcomA_map     | GTCCGTGAACCGACATTCAG           | This study                 |
| FcomP_map     | CGATACGTTTGTATAAAAAGCCAAA      | This study                 |
| RcomP_map     | TGTGGATTTTATTTTGAGCAGGT        | This study                 |

151  
152  
153  
154

**Supplementary Table 4.** MZmine2/ADAP settings used for feature finding.

| <b>Mass Detection Module</b>            |                           |
|-----------------------------------------|---------------------------|
| Mass Detection                          | Centroid, Noise level 500 |
| Wavelet transform                       | Wavelet, Noise level 100  |
| Scale level                             | 5                         |
| Wavelet window size (%)                 | 0.3                       |
| <b>ADAP Chromatogram Builder Module</b> |                           |
| Min group size in # of scans            | 5.0                       |
| Group intensity threshold               | 1000.0                    |
| Min highest intensity                   | 1000.0                    |
| m/z tolerance                           | 0.01 Da/20 ppm            |
| <b>Smoothing Module</b>                 |                           |
| Filter width                            | 25                        |
| <b>Deconvolution Module</b>             |                           |
| Deconvolution                           | Savitzky-Golay            |
| Min peak height                         | 5000.0                    |
| Peak duration range (min)               | 0.01-0.2                  |
| Derivative threshold level              | 0.1                       |
| <b>ADAP3 Decomposition Module</b>       |                           |
| Min cluster distance (min)              | 0.001                     |
| Min cluster size                        | 8                         |
| Min cluster intensity                   | 50000.0                   |
| Find shared peaks                       | False                     |
| Min edge-to-height ratio                | 0.2                       |
| Min delta-to-height ratio               | 0.2                       |
| Min sharpness                           | 10.0                      |
| Shape-similarity tolerance (0..90)      | 80.0                      |
| Choice of Model Peak based on           | Sharpness                 |
| <b>Join Aligner Module</b>              |                           |
| m/z tolerance                           | 0.01 Da/20 ppm            |
| Weight for m/z                          | 50.0                      |
| Retention time tolerance                | 0.05                      |
| Weight for RT                           | 0.05                      |
| Require same charge state               | False                     |
| Require same ID                         | False                     |
| Isotope m/z tolerance                   | 0.001-5                   |
| <b>Peak Finder Module</b>               |                           |
| Intensity tolerance                     | 0.008                     |
| m/z tolerance                           | 0.01 Da/20 ppm            |
| Retention time tolerance                | 0.05                      |
| RT correction                           | False                     |

157 **Supplementary methods**

158

159 **Biofilm formation, colony morphology, swarming motility and hemolytic activity**

160 For pellicle formation, starting cultures of each strain were grown in 5 ml LB (10 g/L tryptone,  
161 5 g/L yeast extract, 10 g/L NaCl) for 8 h at 37°C with agitation. Three µl of the starting culture  
162 were used to inoculate 3 ml LBGM (LB supplemented with 1% glycerol (v/v) and 100 µl  
163 MnSO<sub>4</sub>) in 96-well microtiter plates and in glass tubes, and incubation without agitation was  
164 performed at 30°C. For quantification of biofilm formation, unattached cells and media were  
165 remove from tubes and/or 96-well microtiter plates and biofilms were stained with 0.1%  
166 crystal violet (w/v) for 15 min. Tubes and/or wells were washed twice with 0.1 % NaCl (w/v)  
167 and the stained biofilms were solubilized in 125 µl of 30% acetic acid (v/v). Quantification of  
168 biofilm production was finally assessed by measuring optical density at 595 nm using 30%  
169 acetic acid (v/v) in water as blank. To evaluate colony morphology, 2 µl of the starting culture  
170 were spotted onto the surface of LB and LBGM 1.2% agar (w/v) plates, incubated 3-5 days  
171 at 30°C, and colonies were analyzed and photographed. To evaluate swarming motility, cells  
172 were collected from an overnight colony with a sterile toothpick and inoculated in the center  
173 of LB plates with 0.7% agar (w/v). Plates were incubated at 37°C and evaluated for colony  
174 spread as a function of time. The capacity of *B. subtilis* pre-ST and post-ST variants to lyse  
175 red blood cells was assessed by inoculating 3 µl of starting cultures of each strain, obtained  
176 as described above, on 5% blood (v/v) 1.5 % (w/v) agar plates. The test was considered  
177 positive when a clear halo was observed around the colonies after an incubation of 18 h at  
178 37°C.

179

180 **Obtaining of bacterial cell-free supernatants and fungal inhibition assay**

181 *B. subtilis* pre-ST and post-ST variants were grown in LB broth and incubated for 16–18 h  
182 at 30 °C. The cell-free supernatant of each variant was obtained by centrifugation of the

183 bacterial suspension (10,000 rpm, 10 min) and subsequent filtration (0.2 µm pore size filter).  
184 100 µl of supernatant were plated in PDA and allowed complete diffusion before inoculating  
185 a 5 mm diameter agar disk with mycelium of *S. terrestris*. Plates were incubated at 28 °C for  
186 7 days. PDA plates containing only fungal mycelium were used as controls.

187

### 188 **Electron scanning microscopy of *B. subtilis* variants**

189 *B. subtilis* pre-ST and post-ST variants were exponentially grown at 30 °C in LB broth, and  
190 samples for electron microscopy were then collected, centrifuged, and fixed with 4 %  
191 formaldehyde-2 % formalin in 0.1 M cacodylate buffer for 1 h at room temperature. An  
192 additional fixation with 1% osmium tetroxide in cacodylate buffer was carried out for 1 h at  
193 room temperature. These fixed cells were dehydrated using an increasing concentration of  
194 acetone, and embedded in polymerized Araldite at 60°C for 48 hours. Thin sections were  
195 obtained using a JEOL JUM-7 microtome equipped with a glass or gem grade diamond  
196 knife, and microphotography was performed with a Zeiss LEO 906E microscope.

197

### 198 **MS/MS data and featured-based molecular networking analysis**

199 Following LC-MS/MS data acquisition, raw spectra were converted to .mzXML file format  
200 using MSConvert tool (ProteoWizard). MS1 and MS/MS feature extraction was performed  
201 with MZmine v. 2.30<sup>3</sup>. Intensity thresholds 1E5 and 1E3 were used for MS1 and MS/MS  
202 spectra, respectively. For MS1 chromatogram building, mass accuracy 10 ppm and  
203 minimum peak intensity 5E5 were set. Extracted Ion Chromatograms (XICs) were  
204 deconvoluted using baseline cutoff at intensity 1E5. After deconvolution, MS1 features were  
205 matched to MS/MS spectra within 0.02 m/z and 0.2 min retention time windows. Isotope  
206 peaks were grouped, and features from different samples were aligned with mass tolerance  
207 10 ppm and retention time tolerance 0.1 min. MS1 features without assigned MS2 features  
208 were filtered out of the resulting matrix, as were features that did not contain isotope peaks

209 or did not occur in at least three samples. After filtering, gaps in the feature matrix were filled  
210 with relaxed retention time tolerance 0.2 min and mass tolerance 10 ppm. The feature table  
211 was exported as .csv file and corresponding MS/MS spectra as .mgf. file. Contaminate  
212 features observed in Blank samples were filtered, and only those with relative abundance  
213 ratio blank to average in the samples <50% were considered for further analysis.  
214 For spectra networking and spectrum library matching, the .mgf file was uploaded to GNPS  
215 (gnps.ucsd.edu)<sup>4, 5</sup>. For networking, minimum cosine score to define a correlation between  
216 spectra was set to 0.7, Precursor Ion Mass Tolerance to 0.01 Da, Fragment Ion Mass  
217 Tolerance to 0.01 Da, Minimum Matched Fragment Ions to 4, Minimum Cluster Size to 1  
218 (MS Cluster off), and Library Search Minimum Matched Peaks to 4. When Analog Search  
219 was performed, Cosine Score Threshold was 0.7 and Maximum Analog Search Mass  
220 Difference was 100. Molecular networks were visualized using software program Cytoscape  
221 v. 3.4<sup>6</sup>, and node information was matched with MS1 feature table. Tridimensional PCoA  
222 plots of MS1 data were generated by in-house tool ClusterApp using Bray-Curtis distance  
223 metric. Resulting scatter plots were visualized on EMPERor. Random forest classification  
224 was performed in R.

225

## 226 **<sup>1</sup>H-NMR spectroscopy-based metabolic profiling of cell-free supernatants of *B.*** 227 ***subtilis* pre- and post-ST variants**

228 <sup>1</sup>H-NMR spectroscopy and multivariate data analysis were performed at PLABEM  
229 (Plataforma Argentina de Biología Estructural y Metabólica; Rosario, Argentina).  
230 Samples were prepared for <sup>1</sup>H-NMR as described in<sup>7</sup>. Briefly, 540 µl of the supernatant were  
231 mixed with 60 µl phosphate buffer (pH 7.4) containing sodium 3-trimethylsilyl-(2,2,3,3-<sup>2</sup>H<sub>4</sub>)-  
232 1-propionate (TSP) in D<sub>2</sub>O (final concentration 0.1 mg/mL). TSP acts as internal chemical  
233 shift reference (δ= 0.0), while D<sub>2</sub>O provides lock signal for the spectrometer. Samples were  
234 stood for 10 min, then centrifuged at 4000 rpm for 10 min to remove any precipitates. 500 µl

235 of centrifuged solution were transferred to NMR tube. A pooled quality control sample (QC  
236 (2)) was prepared by mixing equal volumes (100  $\mu$ L) of all 12 samples.

237 Spectra were obtained at 300 K using an Avance 600 MHz NMR spectrometer (Bruker  
238 BioSpin; Rheinstetten, Germany) equipped with 5-mm TXI probe. One-dimensional  $^1\text{H}$ -NMR  
239 spectra of conditioned culture media were acquired using standard 1-D NOESY pulse  
240 sequence (noesygppr1d) with water presaturation<sup>8</sup>. Mixing time was set to 10 ms, data  
241 acquisition period to 2.73 s, and relaxation delay to 4  $\mu$ s.  $^1\text{H}$ -NMR spectra were acquired  
242 using 4 dummy scans and 32 scans, with 64K time domain points and spectral window 20  
243 ppm. FIDs were multiplied by an exponential weighting function corresponding to line  
244 broadening 0.3 Hz.

245 Spectroscopic data was processed by MATLAB v. R2015b (MathWorks Inc.; U.S.). Spectra  
246 were referenced to TSP at 0.0 ppm, with baseline correction and phasing of spectra  
247 performed using in-house software (provided by T. Ebbels and H. Keun, Imperial College,  
248 UK). Each spectrum was reduced to a series of integrated regions of equal width (0.04 ppm,  
249 standard bucket width). Spectral regions containing no metabolite signals and TSP signal  
250  $<0.2$  ppm, and the interval containing the water signal (between 4.9 and 4.6 ppm) were  
251 excluded. Each spectrum was then normalized by probabilistic quotient method<sup>9</sup>.

252 Pre-processed  $^1\text{H}$ -NMR spectral data were imported to SIMCA (v. 14.1, Umetrics AB; Umeå,  
253 Sweden) for multivariate data analysis. Principal Component Analysis (PCA) was performed  
254 using the Pareto-scaled NMR dataset. Orthogonal partial least squares discriminative  
255 analysis (OPLS-DA) was performed to maximize separation between treatment groups. S-  
256 line plots (tailored S-plots)<sup>10</sup> useful for NMR data analysis) were generated to visualize  
257 differences between classes in OPLS-DA models. Full cross validation (CV) was performed  
258 to ensure valid and reliable models and to avoid overfitting<sup>11</sup>.

259

260



261 **Supplementary References**

262

263 1. Straight PD, Willey JM, Kolter R. Interactions between *Streptomyces coelicolor* and  
264 *Bacillus subtilis*: Role of Surfactants in Raising Aerial Structures. *Journal of*  
265 *Bacteriology* **188**, 4918-4925 (2006).

266

267 2. Bais HP, Fall R, Vivanco JM. Biocontrol of *Bacillus subtilis* against infection of  
268 *Arabidopsis* roots by *Pseudomonas syringae* is facilitated by biofilm formation and  
269 surfactin production. *Plant Physiology* **134**, 307-319 (2004).

270

271 3. Pluskal T, Castillo S, Villar-Briones A, Orešič M. MZmine 2: Modular framework for  
272 processing, visualizing, and analyzing mass spectrometry-based molecular profile  
273 data. *BMC Bioinformatics* **11**, 395 (2010).

274

275 4. Wang M, *et al.* Sharing and community curation of mass spectrometry data with  
276 Global Natural Products Social Molecular Networking. *Nature Biotechnology* **34**, 828  
277 (2016).

278

279 5. Kjeldgaard B, Listian SA, Ramaswamhi V, Richter A, Kiese-walter HT, Kovács ÁT.  
280 Fungal hyphae colonization by *Bacillus subtilis* relies on biofilm matrix components.  
281 *Biofilm* **1**, 100007 (2019).

282

283 6. Shannon P, *et al.* Cytoscape: A software environment for integrated models of  
284 biomolecular interaction networks. *Genome Research* **13**, 2498-2504 (2003).

285

286 7. Dona AC, *et al.* Precision high-throughput proton NMR spectroscopy of human urine,  
287 serum, and plasma for large-scale metabolic phenotyping. *Analytical chemistry* **86**,  
288 9887-9894 (2014).

289

290 8. Nicholson JK, Foxall PJ, Spraul M, Farrant RD, Lindon JC. 750 MHz <sup>1</sup>H and <sup>1</sup>H-<sup>13</sup>C  
291 NMR spectroscopy of human blood plasma. *Analytical Chemistry* **67**, 793-811  
292 (1995).

293

294 9. Dieterle F, Ross A, Schlotterbeck G, Senn H. Probabilistic quotient normalization as  
295 robust method to account for dilution of complex biological mixtures. Application in  
296 <sup>1</sup>H NMR metabonomics. *Analytical Chemistry* **78**, 4281-4290 (2006).

297

298 10. Wiklund S, *et al.* Visualization of GC/TOF-MS-based metabolomics data for  
299 identification of biochemically interesting compounds using OPLS class models.  
300 *Analytical Chemistry* **80**, 115-122 (2008).

301

302 11. Kjeldahl K, Bro R. Some common misunderstandings in chemometrics. *Journal of*  
303 *Chemometrics* **24**, 558-564 (2010).

304

305

306
